# Supplementary material for: Type D Personality and Diabetes Self-Management in Type 2 Diabetes: A Mediation–Moderation Model on Glycemic Control and Quality of Life
Source: Research Square preprint supplement (doi:10.21203/rs.3.rs-8181318/v1), 2025-12-02
Supplement: Supplementary file 1 [file 61cf4121872ed04c1c628637.pdf]

## **Sociodemographic and Clinical Data Form**

This form was specifically developed for the study titled ‘Type D Personality and Diabetes Self-Management in Type 2 Diabetes: A Mediation–Moderation Model on Glycemic Control and Quality of Life’.

The purpose of this form is to collect demographic, socioeconomic, health-related, and lifestyle information from participants.

Please complete the form accurately and completely. All information will be kept confidential.

**Participant ID (for research use):** \_\_\_\_\_

**Age:** \_\_\_\_\_

**Sex:**

1. Female
2. Male

**Marital Status:**

3. Married
4. Single
5. Divorced
6. Widowed
7. Other: \_\_\_\_\_

---

**Educational Status**

Years of Education: \_\_\_\_\_ years

---

**Economic and Social Status**

Occupation \_\_\_\_\_

**Household Monthly Income (TRY)**

1. Near minimum wage
2. Minimum wage

3. Twice the minimum wage
4. Three times the minimum wage or above

**Employment Status:**

1. Employed (Full-time)
2. Employed (Part-time)
3. Unemployed
4. Retired
5. Homemaker

**Place of Residence**

1. Urban
2. Rural

---

**Health-Related Information**

**Comorbid Conditions:**

1. Hypertension
2. Cardiovascular disease
3. Kidney disease
4. Eye diseases (e.g., retinopathy)
5. Other: \_\_\_\_\_

**Family History of Diabetes:**

1. Yes
2. No

**Most Recent HbA1c Level:** \_\_\_\_\_ %

**Fasting Glucose Level:** \_\_\_\_\_ mg/dL

**Postprandial Glucose Level:** \_\_\_\_\_ mg/dL

---

## **Lifestyle and Habits**

### **Smoking Status:**

1. Currently smoking
2. Quit
3. Never smoked

### **Alcohol Use:**

1. Currently using
2. Quit
3. Never used

### **Physical Activity Status:**

1. Regular physical activity ( $\geq 3$  times per week)
2. Occasional physical activity
3. No physical activity

### **Dietary Habits:**

1. Following a diet recommended by a dietitian
2. Following a self-selected diet
3. Not following a healthy diet

### **Sleep Duration (average hours/day):**

1. Less than 4 hours
2. 4–6 hours
3. 6–8 hours (ideal)
4. 8–10 hours
5. More than 10 hours

### **Sleep Pattern:**

1. Regular
2. Irregular

---

**Psychosocial Status****History of Psychiatric Diagnosis:**

1. Yes: \_\_\_\_\_
2. No

**Receiving Psychological Support:**

1. Yes
2. No

**Significant Stressful Event in the Last 6 Months:**

1. Yes: \_\_\_\_\_
2. No
